# Supplementary material for: Early cellular mechanisms of type I interferon-driven susceptibility to tuberculosis
Source: PubMed Central journal article supplement (PMC10757650; doi:10.1016/j.cell.2023.11.002), 2023-11-28
Supplement: NIHMS1947235-supplement-2.pdf [file NIHMS1947235-supplement-2.pdf]

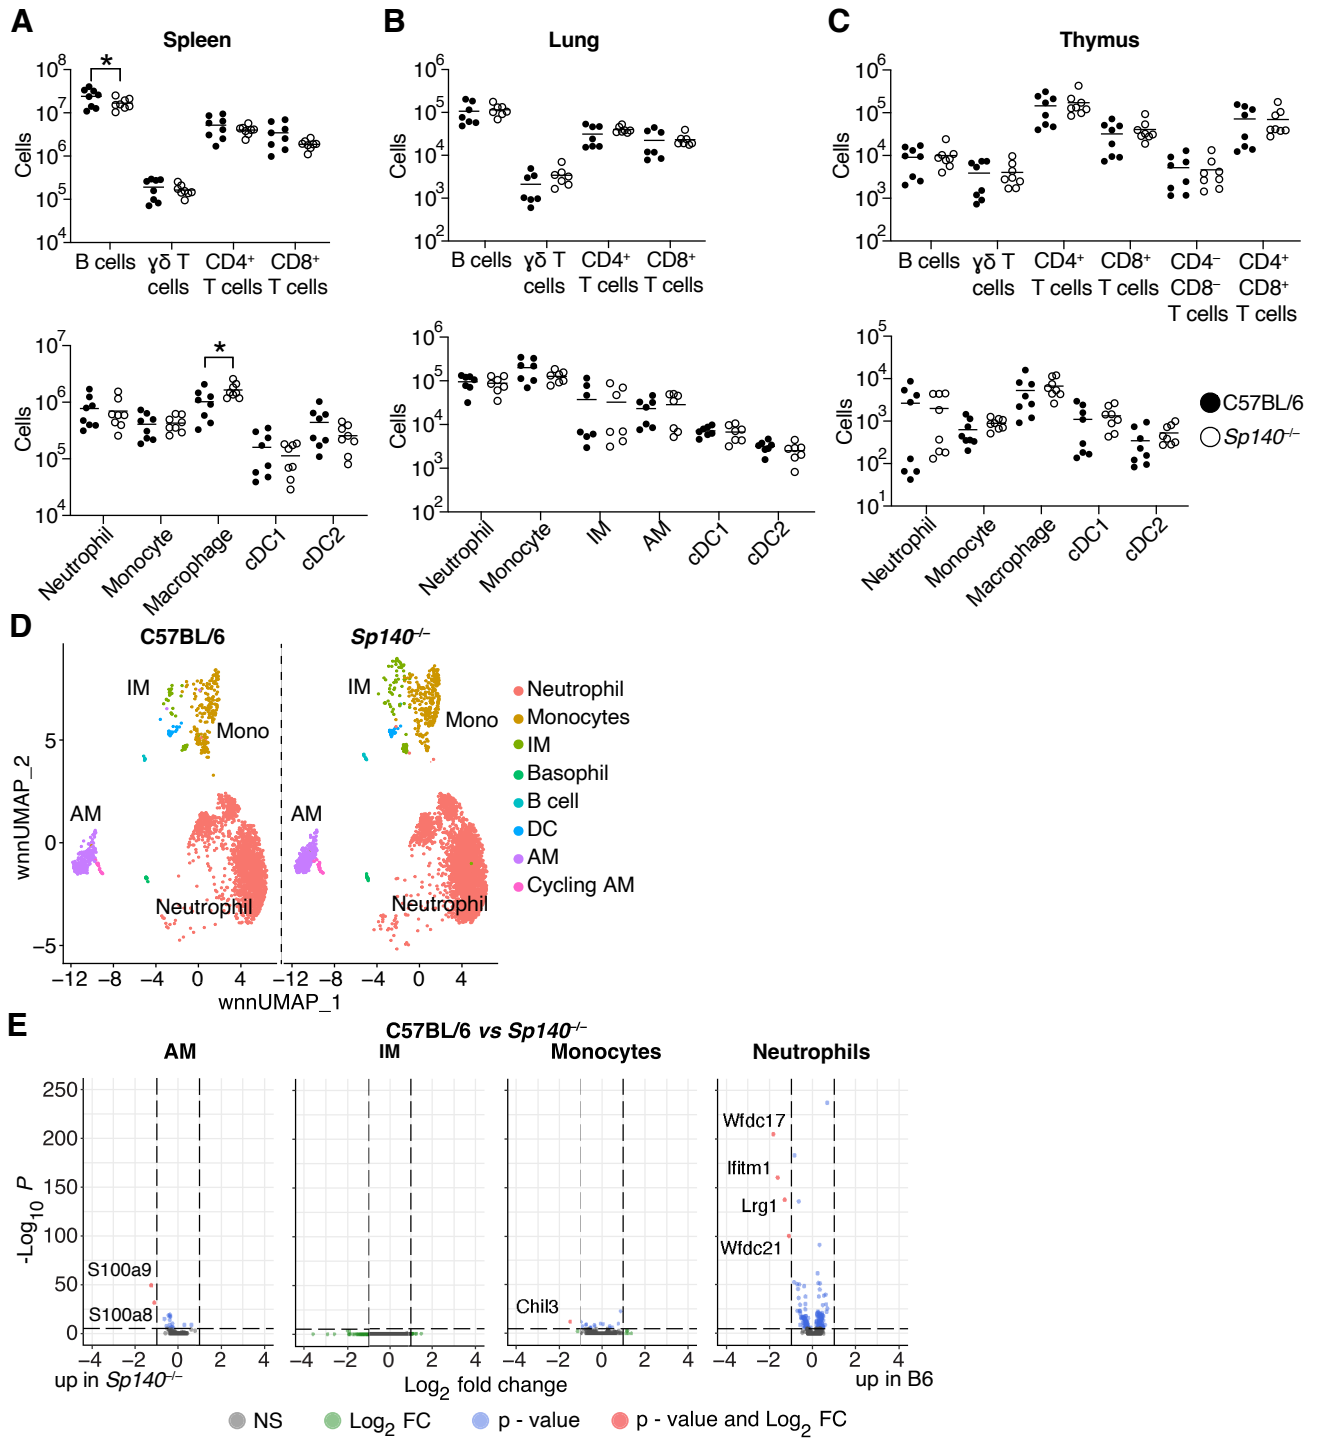

Supplementary Figure 2. Naïve *Sp140*<sup>-/-</sup> mice exhibit minimally altered immune cell numbers by flow cytometry and scRNA-seq. Related to Figure 2.
