# Supplementary material for: Early cellular mechanisms of type I interferon-driven susceptibility to tuberculosis
Source: PubMed Central journal article supplement (PMC10757650; doi:10.1016/j.cell.2023.11.002), 2023-11-28
Supplement: NIHMS1947235-supplement-3.pdf [file NIHMS1947235-supplement-3.pdf]

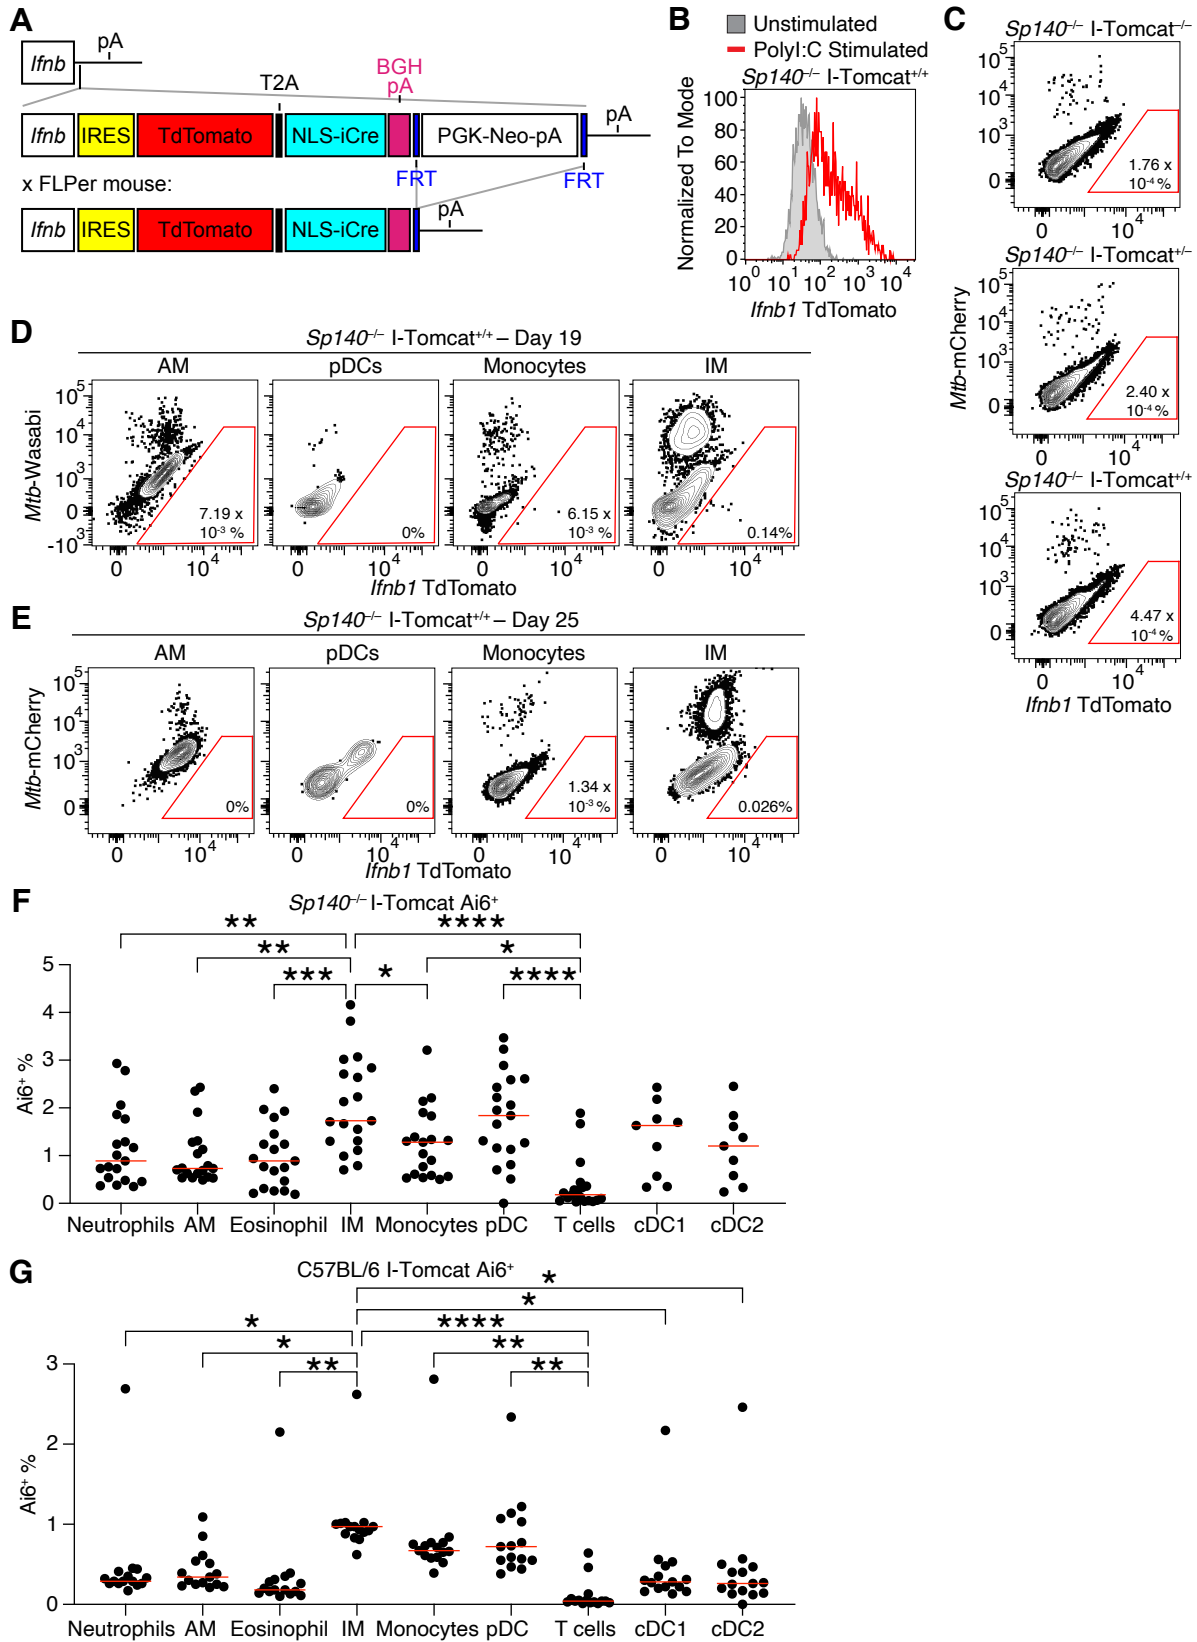

**Supplementary Figure 3. I-Tomcat cells express TdTomato following *in vitro* stimulation, but the TdTomato signal is undetectable *in vivo* during *Mtb* infection. Using I-Tomcat Ai6 mice, pDC, IMs, and monocytes are the major type I interferon producing cells following *Mtb* infection<sup>+/+</sup> in B6 and *Sp140<sup>-/-</sup>* mice. Related to Figure 3.**
