# Supplementary material for: Early cellular mechanisms of type I interferon-driven susceptibility to tuberculosis
Source: PubMed Central journal article supplement (PMC10757650; doi:10.1016/j.cell.2023.11.002), 2023-11-28
Supplement: NIHMS1947235-supplement-4.pdf [file NIHMS1947235-supplement-4.pdf]

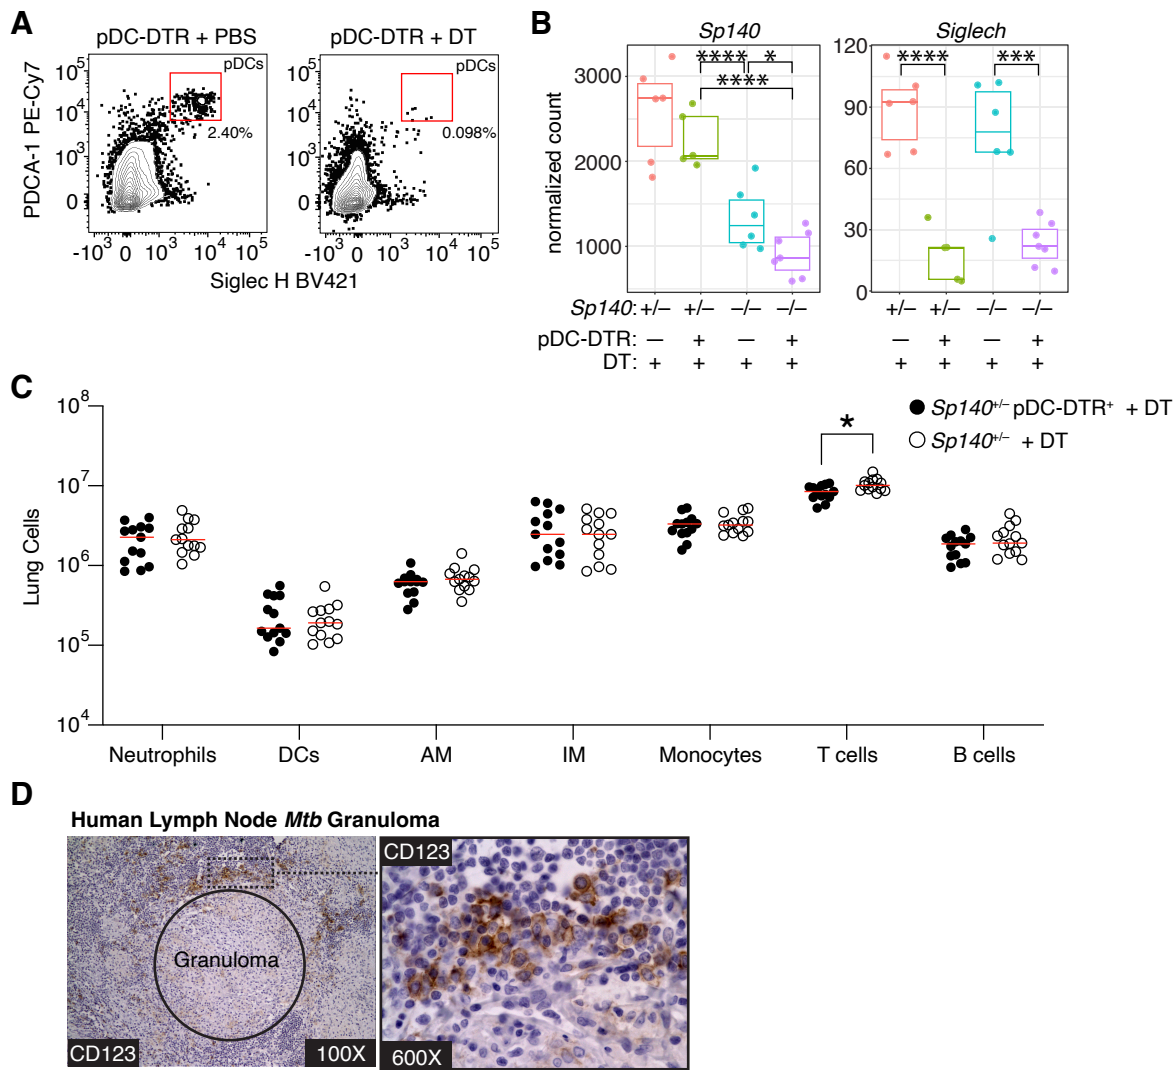

Supplementary Figure 4. pDC-DTR mice specifically deplete pDCs without affecting major lung immune cell populations, and CD123 also identifies pDCs in *Mtb*-infected human lymph node samples. Related to Figure 5.
