# Supplementary material for: Early cellular mechanisms of type I interferon-driven susceptibility to tuberculosis
Source: PubMed Central journal article supplement (PMC10757650; doi:10.1016/j.cell.2023.11.002), 2023-11-28
Supplement: NIHMS1947235-supplement-5.pdf [file NIHMS1947235-supplement-5.pdf]

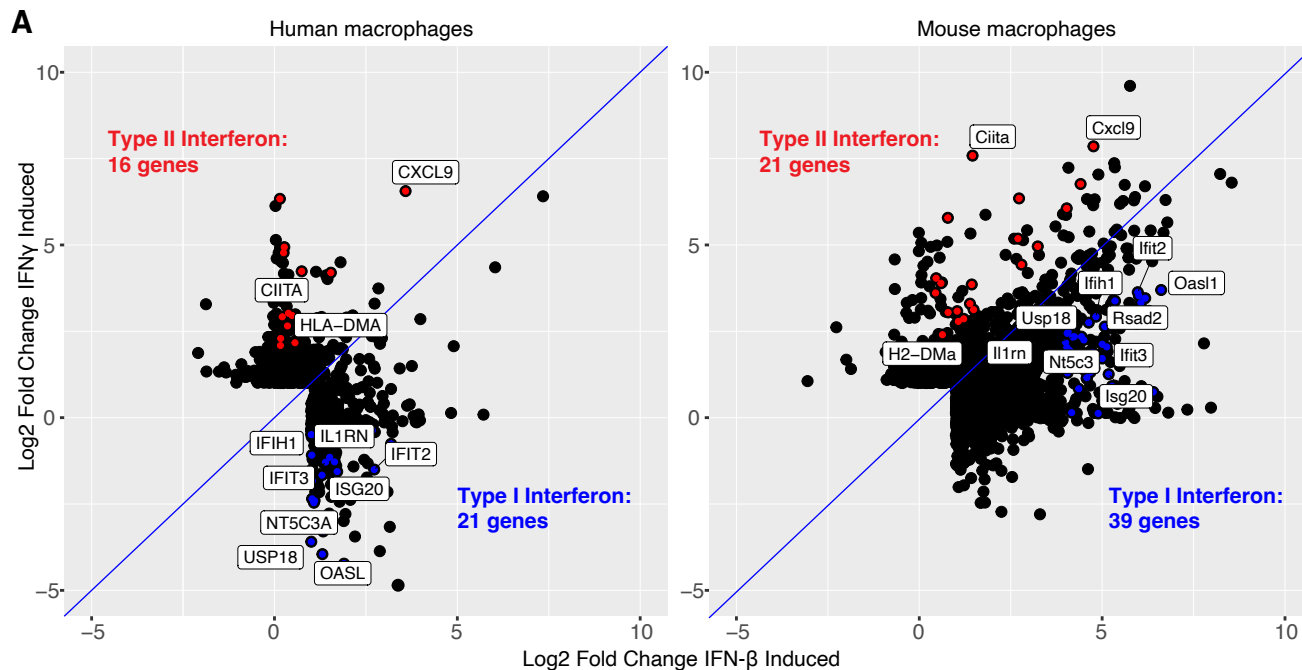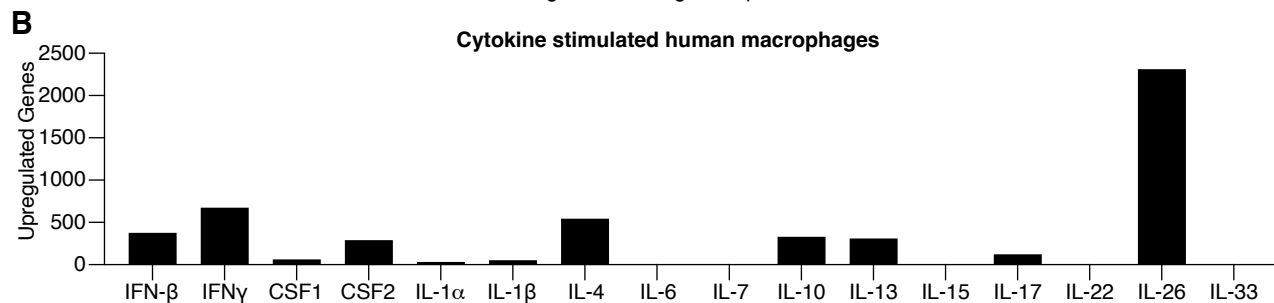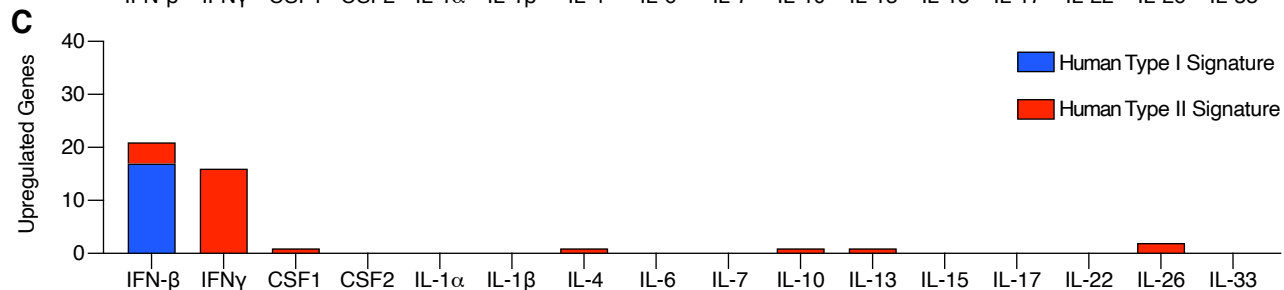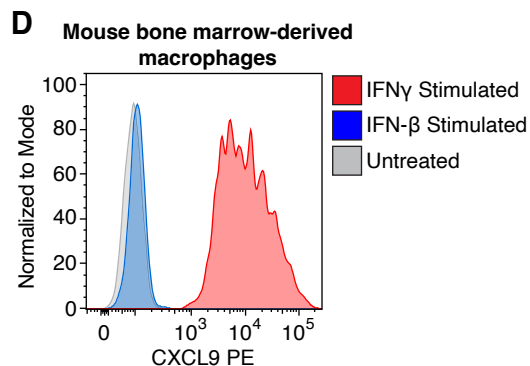

Supplementary Figure 5. Generating gene signatures for identifying IFN $\gamma$  and type I IFN responding cells. Related to Figure 7.
