# Supplementary material for: Early cellular mechanisms of type I interferon-driven susceptibility to tuberculosis
Source: PubMed Central journal article supplement (PMC10757650; doi:10.1016/j.cell.2023.11.002), 2023-11-28

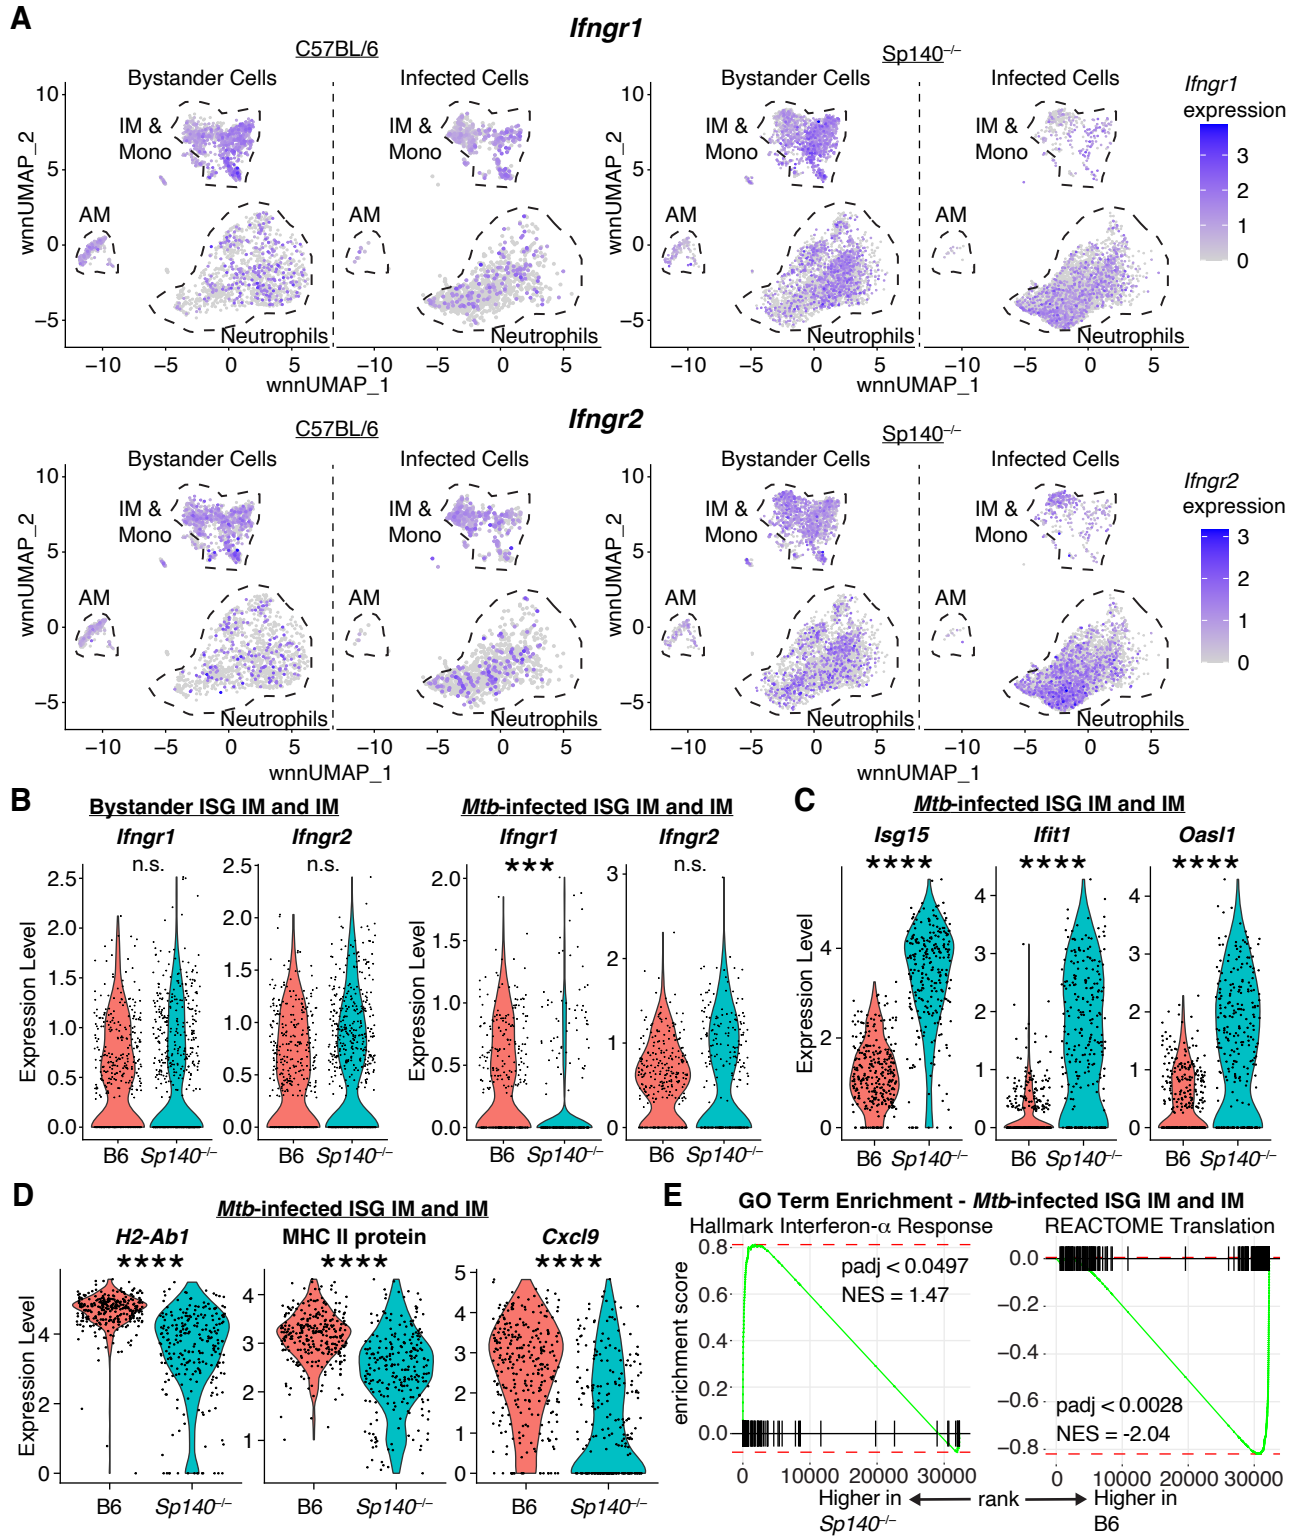

Supplement: NIHMS1947235-supplement-7.pdf [file NIHMS1947235-supplement-7.pdf]
