# Supplementary material for: Early cellular mechanisms of type I interferon-driven susceptibility to tuberculosis
Source: PubMed Central journal article supplement (PMC10757650; doi:10.1016/j.cell.2023.11.002), 2023-11-28
Supplement: NIHMS1947235-supplement-8.pdf [file NIHMS1947235-supplement-8.pdf]

## Supplementary Tables

### Supplementary Table 1

| Tissue     | Cases | Cases with CD303 <sup>+</sup> cells (% total) | pDC Distribution              |                                |                        |
|------------|-------|-----------------------------------------------|-------------------------------|--------------------------------|------------------------|
|            |       |                                               | Groups of >20 cells (% total) | Groups of 5-20 cells (% total) | Single cells (% total) |
| Lung       | 8     | 5 (63%)                                       | 0                             | 1 (20%)                        | 4 (80%)                |
| Lymph node | 8     | 7 (88%)                                       | 3 (43%)                       | 1 (14%)                        | 3 (43%)                |

**Supplementary Table 1. Quantification of the number of human lung and lymph nodes with pDCs in the same field of view as *Mtb* granulomas, as well as enumeration of the pDC distribution. Related to Figure 5.**
